# Supplementary material for: Plasmodium vivax Cysteine-Rich Protective Antigen Polymorphism at Exon-1 Shows Recombination and Signatures of Balancing Selection
Source: MDPI journal article supplement (doi:10.3390/genes12010029), 2020-12-28
Supplement: s1 [file s1]

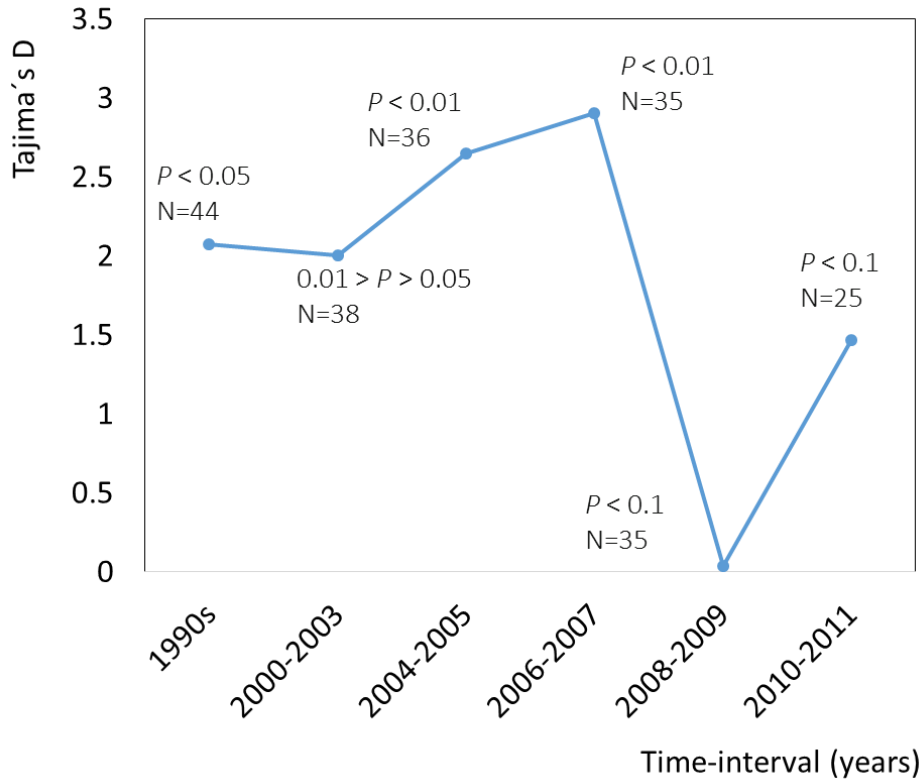

**Figure S3.** Tajima's D (TjD) values using *pvama1* sequences obtained in period 1993 – 2011 in southern Mexico. The TjD was estimated for different time period. The values were consistently positive, and did not correlate with the reduction of malaria cases. The graph shows that in parasites from the 1990s of high transmission, the TjD values was positive and significant, then it varied, also 2004-2005 and 2006 and 2007 were positive and significant, the last period TjD value was not significant (2010-2011). The last two periods represent a significant decrease in malaria cases. Sequences were retrieved from Genbank: KP759815-KP759849 (Gonzalez-Ceron et al., 2015) and KY094724-KY094901 (Flores Alanis et al., 2017), and Tajima's values determined in dnaSP v6. Sequence of 702 bp.
